# Supplementary material for: Revisiting the Zingiberales: using multiplexed exon capture to resolve ancient and recent phylogenetic splits in a charismatic plant lineage
Source: PubMed Central journal article supplement (PMC4727956; doi:10.7717/peerj.1584), 2016-01-21

### Histogram of average coverage per exon

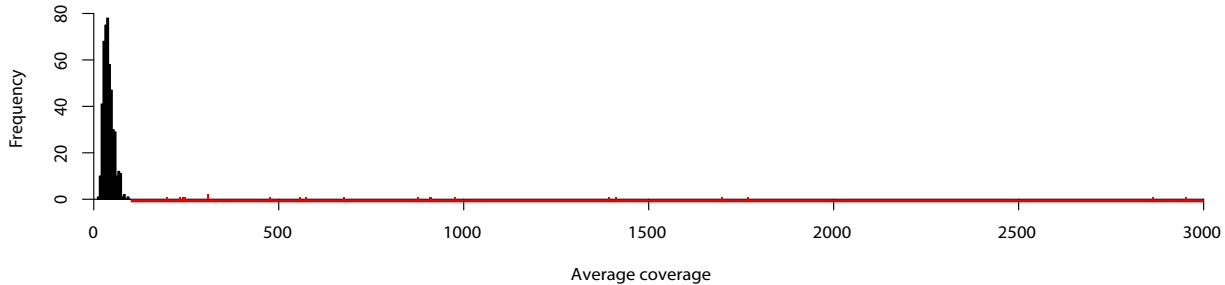

Supplement: peerj-04-1584-s004.pdf [file peerj-04-1584-s004.pdf]
